# Supplementary material for: Cytotoxic Compounds from Alcyoniidae: An Overview of the Last 30 Years
Source: MDPI journal article supplement (doi:10.3390/md20020134), 2022-02-11
Supplement: s1 [file s1]

**Table S1.** Most active cembranoids isolated from Alcyoniidae.

| Compound                                                                                                   | Species                         | Cells                                 | Cancer type                                                                                                               | Organism                         | IC <sub>50</sub> (or ED <sub>50</sub> ) µg/mL<br>or µM           | IC <sub>50</sub> (or ED <sub>50</sub> )<br>positive control                 | Quantity of<br>extract per kg of<br>coral   | Absolute<br>quantity of<br>isolated<br>products | Ref. |
|------------------------------------------------------------------------------------------------------------|---------------------------------|---------------------------------------|---------------------------------------------------------------------------------------------------------------------------|----------------------------------|------------------------------------------------------------------|-----------------------------------------------------------------------------|---------------------------------------------|-------------------------------------------------|------|
| Lobomichaolide (1);<br>crassolide (2)                                                                      | <i>Lobophytum<br/>michaelae</i> | A-549<br>HT-29<br>KB<br>P-388         | Lung epithelial carcinoma<br>Colon adenocarcinoma<br>Nasopharyngeal carcinoma<br>Lymphocytic leukemia                     | Human<br>Human<br>Human<br>Mouse | 0.38; 0.39<br>0.37; 0.26<br>0.59; 0.85<br>0.34; 0.08             | Not reported                                                                | 8.9 g/kg                                    | 70 mg;<br>50 mg                                 | [22] |
| Lobohedleolide (4)                                                                                         | <i>Lobophytum<br/>crassum</i>   | P-388                                 | Lymphocytic leukemia                                                                                                      | Mouse                            | 2.44                                                             | Not reported                                                                | 75.8 g/kg                                   | Not reported                                    | [23] |
| Lobocrassolide (3)                                                                                         | <i>Lobophytum<br/>crassum</i>   | A-549<br>HT-29<br>KB<br>P-388         | Lung epithelial carcinoma<br>Colon adenocarcinoma<br>Nasopharyngeal carcinoma<br>Lymphocytic leukemia                     | Human<br>Human<br>Human<br>Mouse | 2.99<br>2.70<br>2.91<br>0.012                                    | Not reported                                                                | 75.8 g/kg                                   | 55 mg                                           | [23] |
| Lobohedleolide (4);<br>Crassumolide A (5)                                                                  | <i>Lobophytum<br/>crassum</i>   | Ca9-22                                | Gingival squamous cell carcinoma                                                                                          | Human                            | 3.2;<br>2.8                                                      | 0.1 (Doxorubicin)                                                           | 20.9 g/kg                                   | 1,2 g;<br>9.7 mg                                | [24] |
| Lobocrassol (11)                                                                                           | <i>Lobophytum<br/>crassum</i>   | P-388                                 | Lymphocytic leukemia                                                                                                      | Mouse                            | 3.2                                                              | Not reported                                                                | 30 g/kg                                     | 2 mg                                            | [26] |
| (1S,2S,3E,7E,11E)-3,7,11,15-<br>cembratetraen-17,2-olide (13)                                              | <i>Lobophytum<br/>sp.</i>       | A-549<br>HT-29                        | Lung epithelial carcinoma<br>Colon adenocarcinoma                                                                         | Human<br>Human                   | 5.1<br>1.8                                                       | 6.1<br>6.5 (Mitoxantrone)                                                   | 26.5 g/kg                                   | 70 mg                                           | [27] |
| Drumolide P (14)                                                                                           | <i>Lobophytum<br/>durum</i>     | P-388                                 | Lymphocytic leukemia                                                                                                      | Mouse                            | 3.8                                                              | Not reported                                                                | 30 g/kg                                     | 2 mg                                            | [28] |
| Lobocrassin B (18)                                                                                         | <i>Lobophytum<br/>crassum</i>   | K-562<br>CCRF-CEM<br>Molt-4<br>Hep G2 | Chronic myelogenous leukemia<br>T-cell lymphoblastic leukemia<br>Acute lymphoblastic leukemia<br>Hepatocellular carcinoma | Human<br>Human<br>Human<br>Human | 2.97<br>0.48<br>0.34<br>3.44                                     | 0.24<br>0.05<br>0.07<br>0.71 (Doxorubicin)                                  | Not reported                                | 1.0 mg                                          | [30] |
| Lobomichaolide (1);<br>michaolide L (29);<br>michaolide N (30);<br>michaolide P (31);<br>michaolide Q (32) | <i>Lobophytum<br/>michaelae</i> | P-388<br>HT-29<br>A-549               | Lymphocytic leukemia<br>Colon adenocarcinoma<br>Lung epithelial carcinoma                                                 | Mouse<br>Human<br>Human          | 0.3-2.0<br>0.8-4.9<br>1.2-3.2                                    | Not reported                                                                | 18.2 g/kg                                   | 25 mg;<br>5 mg;<br>3 mg;<br>1 mg;<br>1mg        | [34] |
| Lobocrassin B (18);<br>13-acetoxysarcocrassocolide<br>(42);<br>14-deoxycrassin (44)                        | <i>Lobophytum<br/>crassum</i>   | K-562<br>Molt-4<br>U-937<br>Sup-T1    | Chronic myelogenous leukemia<br>Acute lymphoblastic leukemia<br>Histiocytic lymphoma<br>T-lymphoblastic lymphoma          | Human<br>Human<br>Human<br>Human | 3.3; 3.3; 4.5<br>2.3; 1.2; 2.9<br>5.2; 7.1; 7.0<br>6.2; 1.5; 4.5 | 0.13<br>0.02<br>0.04<br>0.09 (Doxorubicin)                                  | 17.8 g/kg                                   | 7.9 mg; 1264.5<br>mg; 34.3 mg                   | [40] |
| Lobophytolin D (49)                                                                                        | <i>Lobophytum<br/>sp.</i>       | HT-29<br>Capan-1<br>A-549<br>SNU-398  | Colonic carcinoma<br>Pancreatic carcinoma<br>Lung epithelial carcinoma<br>Hepatocellular carcinoma                        | Human<br>Human<br>Human<br>Human | 4.52 ± 0.82<br>6.62 ± 4.02<br>5.17 ± 0.86<br>6.15 ± 2.88         | 2.39 ± 0.77<br>6.90 ± 1.81<br>76.06 ± 20.45<br>0.36 ± 0.22<br>(Vincristine) | 23.8 g/kg (kg of<br>coral in dry<br>weight) | 10.5 mg                                         | [42] |

Table S1. Cont.

| Compound                                                                                                                                    | Species                        | Cells      | Cancer type               | Organism | IC <sub>50</sub> (or ED <sub>50</sub> ) µg/mL or µM              | IC <sub>50</sub> (or ED <sub>50</sub> ) positive control | Quantity of extract per kg of coral     | Absolute quantity of isolated products                        | Ref. |
|---------------------------------------------------------------------------------------------------------------------------------------------|--------------------------------|------------|---------------------------|----------|------------------------------------------------------------------|----------------------------------------------------------|-----------------------------------------|---------------------------------------------------------------|------|
| Durumolide J (52);<br>lobophytolide D (53);<br>lobolide A (54)                                                                              | <i>Lobophytum crassum</i>      | HT-29      | Colonic carcinoma         | Human    | 3.1; 2.4; 1.5                                                    | 0.0024                                                   | 7 g/kg                                  | 3.7 mg;                                                       | [43] |
|                                                                                                                                             |                                | Capan-1    | Pancreatic carcinoma      | Human    | 2.8; 1.9; 1.6                                                    | 0.0026                                                   |                                         | 3.8 mg;                                                       |      |
|                                                                                                                                             |                                | A-549      | Lung epithelial carcinoma | Human    | 7.4; 7.4; 6.9                                                    | 0.0477                                                   |                                         | 28.1 mg                                                       |      |
|                                                                                                                                             |                                | SNU-398    | Hepatocellular carcinoma  | Human    | 4.0; 2.6; 1.8                                                    | 0.0008<br>(Vincristine)                                  |                                         |                                                               |      |
| Sarcocrassolide (56);<br>crassolide (2);<br>13-acetoxysarcocrassolide (57);<br>denticulatolide (58)                                         | <i>Sarcophyton crassocaule</i> | A-549      | Lung epithelial carcinoma | Human    | 8.31; 4.29; 4.66; 6.46                                           | Not reported                                             | 71.4 g/kg                               | 27 mg;                                                        | [45] |
|                                                                                                                                             |                                | HT-29      | Colon adenocarcinoma      | Human    | 7.55; 4.97; 5.67; 5.78                                           |                                                          |                                         | 54 mg;                                                        |      |
|                                                                                                                                             |                                | KB         | Epidermoid carcinoma      | Human    | 9.15; 8.35; 7.39; 6.29                                           |                                                          |                                         | 200 mg;                                                       |      |
|                                                                                                                                             |                                | P-388      | Lymphocytic leukemia      | Mouse    | 0.16; 0.14; 0.38; 0.15                                           |                                                          |                                         | not reported                                                  |      |
| Lobophytolide (53);<br>Crassocolide A (66);<br>crassocolide F (67)                                                                          | <i>Sarcophyton crassocaule</i> | HepG2      | Hepatocellular carcinoma  | Human    | 6.3; 3.1; 2.1                                                    | 0.2                                                      | 14.3 g/kg                               | 27.8 mg;                                                      | [49] |
|                                                                                                                                             |                                | MCF-7      | Breast carcinoma          | Human    | 2.3; 8.9; 7.4                                                    | 0.3                                                      |                                         | 47.3 mg;                                                      |      |
|                                                                                                                                             |                                | MDA-MB-231 | Breast adenocarcinoma     | Human    | 2.0; 8.6; 8.8                                                    | 0.1                                                      |                                         | 2.2 mg                                                        |      |
|                                                                                                                                             |                                | A-549      | Lung epithelial carcinoma | Human    | 2.1; 11.9; 3.2                                                   | 0.2<br>(Doxorubicin)                                     |                                         |                                                               |      |
| Sacrassin A (71);<br>sacrassin B (68);<br>sacrassin D (69);<br>sacrassin E (72);<br>emblide (70)                                            | <i>Sarcophyton crassocaule</i> | KB         | Epidermoid carcinoma      | Human    | 19.0; 5.0; 4.0; 13.0; 5.0                                        | Not reported                                             | 279 g/kg<br>(kg of coral in dry weight) | 30 mg;<br>10 mg;<br>15 mg;<br>6 mg;<br>600 mg                 | [50] |
| Sarcostolide E (75)                                                                                                                         | <i>Sarcophyton stolidotum</i>  | Daoy       | Medulloblastoma           | Human    | 5.5                                                              | Not reported                                             | 10 g/kg                                 | 4.5 mg                                                        | [51] |
| Crassocolide H (80);<br>crassocolide I (81);<br>crassocolide J (82);<br>crassocolide K (83);<br>crassocolide L (84);<br>crassocolide M (85) | <i>Sarcophyton crassocaule</i> | Daoy       | Medulloblastoma           | Human    | 3.8 ± 1.0; 0.8 ± 0.1; 2.8 ± 0.1; 2.5 ± 0.7; 4.1 ± 0.7; 1.1 ± 0.2 | 0.05 ± 0.02<br>(Doxorubicin)                             | 14.3 g/kg                               | 1.5 mg;<br>2.1 mg;<br>1.7 mg;<br>5.2 mg;<br>2.6 mg;<br>2.4 mg | [52] |
| Sarcocrassolide A (86);<br>sarcocrassolide B (87);<br>sarcocrassolide C (88);<br>sarcocrassolide D (89)                                     | <i>Sarcophyton crassocaule</i> | MCF-7      | Breast carcinoma          | Human    | 4.2; 3.2; 2.0; 4.1                                               | 0.14                                                     | 14.6 g/kg                               | 10.2 mg;                                                      | [53] |
|                                                                                                                                             |                                | WiDr       | Colon carcinoma           | Human    | 4.2; 3.2; 1.2; 1.8                                               | 0.15                                                     |                                         | 3.0 mg;                                                       |      |
|                                                                                                                                             |                                | HEp-2      | Laryngeal carcinoma       | Human    | 6.2; 4.5; 2.6; 4.0                                               | 0.07                                                     |                                         | 6.2 mg;                                                       |      |
|                                                                                                                                             |                                | Daoy       | Medulloblastoma           | Human    | 8.8; 5.6; 3.2; 5.4                                               | 0.14<br>(Mitomycin-C)                                    |                                         | 5.7 mg                                                        |      |
| Sarcocrassolide I (93)                                                                                                                      | <i>Sarcophyton crassocaule</i> | MCF-7      | Breast carcinoma          | Human    | 8.4 ± 1.5                                                        | 0.30 ± 0.12                                              | 14.6 g/kg                               | 4.3 mg                                                        | [54] |
|                                                                                                                                             |                                | WiDr       | Colon carcinoma           | Human    | 6.4 ± 2.0                                                        | 0.47 ± 0.12                                              |                                         |                                                               |      |
|                                                                                                                                             |                                | HEp-2      | Laryngeal carcinoma       | Human    | 5.8 ± 0.5                                                        | 0.30 ± 0.06                                              |                                         |                                                               |      |
|                                                                                                                                             |                                | Daoy       | Medulloblastoma           | Human    | 5.1 ± 1.2                                                        | 0.44 ± 0.06<br>(Mitomycin-C)                             |                                         |                                                               |      |

Table 1. Cont.

| Compound | Species | Cells | Cancer type | Organism | IC <sub>50</sub> (or ED <sub>50</sub> ) µg/mL or µM | IC <sub>50</sub> (or ED <sub>50</sub> ) positive control | Quantity of extract per kg of coral | Absolute quantity of isolated products | Ref. |
|----------|---------|-------|-------------|----------|-----------------------------------------------------|----------------------------------------------------------|-------------------------------------|----------------------------------------|------|
|----------|---------|-------|-------------|----------|-----------------------------------------------------|----------------------------------------------------------|-------------------------------------|----------------------------------------|------|

|                                                                                                 |                                  |                            |                                                                                   |                         |                                                  |                                                         |           |                                |      |
|-------------------------------------------------------------------------------------------------|----------------------------------|----------------------------|-----------------------------------------------------------------------------------|-------------------------|--------------------------------------------------|---------------------------------------------------------|-----------|--------------------------------|------|
| Crassocolide A (66);<br>crassocolide B (97);<br>crassocolide E (40)                             | <i>Sarcophyton<br/>crassaule</i> | DLD-1<br>CCRF-CEM<br>HL-60 | Colonic adenocarcinoma<br>T-cell lymphoblastic leukemia<br>Promyelocytic leukemia | Human<br>Human<br>Human | 5.7; 3.8; 7.9<br>6.3; 8.7; 11.1<br>(-); 7.3; 8.4 | 0.77<br>1.16<br>0.046<br>(Doxorubicin)                  | 14.6 g/kg | 3.5 mg;<br>4.3mg;<br>79.8 mg   | [55] |
| 7β-Acetoxy-8α-<br>hydroxydeepoxysarcophine (99)                                                 | <i>Sarcophyton<br/>glaucum</i>   | HepG2<br>HTC-116<br>HeLa   | Hepatocellular carcinoma<br>Colon carcinoma<br>Cervical epithelioid carcinoma     | Human<br>Human<br>Human | 3.6 ± 1.0<br>2.3 ± 1.5<br>6.7 ± 0.8              | 0.49 ± 0.1<br>0.40 ± 0.1<br>0.60 ± 0.08<br>(Paclitaxel) | 5 g/kg    | 12 mg                          | [56] |
| Crassocolide N (100);<br>crassocolide O (101);<br>crassocolide P (102)                          | <i>Sarcophyton<br/>crassaule</i> | KB<br>HeLa<br>Daoy         | Epidermoid carcinoma<br>Cervical epithelioid carcinoma<br>Medulloblastoma         | Human<br>Human<br>Human | 4.7; (-); (-)<br>4.7; (-); 10.8<br>2.8; 4.5; 1.9 | 0.08<br>0.06<br>0.05<br>(Mitomycin-C)                   | 14.3 g/kg | 3.2 mg;<br>2.5 mg;<br>5.2 mg   | [57] |
| Sarcocrassolide M (103);<br>sarcocrassolide N (104);<br>sarcocrassolide O (105)                 | <i>Sarcophyton<br/>crassaule</i> | Daoy                       | Medulloblastoma                                                                   | Human                   | 6.6 ± 0.8; 5.2 ± 0.6; 5.0<br>± 0.7               | 0.44 ± 0.06<br>(Mitomycin-C)                            | 14.6 g/kg | 4.6 mg;<br>2.2 mg;<br>2.1 mg   | [59] |
| sarcotrocheliol acetate (109);<br>deoxosarcophine (110);<br>Sarcotrocheliol (111)               | <i>Sarcophyton<br/>glaucum</i>   | MCF-7                      | Breast carcinoma                                                                  | Human                   | 2.4 ± 0.04;<br>9.9 ± 0.03;<br>3.2 ± 0.02;        | Not reported                                            | 6 g/kg    | 16 mg;<br>12 mg;<br>30.6 mg;   | [61] |
| 7α,8β-dihydroxy-<br>deepoxysarcophine (115)                                                     | <i>Sarcophyton<br/>auritum</i>   | MCF-7<br>HepG2             | Breast carcinoma<br>Hepatocellular carcinoma                                      | Human<br>Human          | 11.0 ± 0.22<br>18.4 ± 0.16                       | 6.4 ± 0.32<br>4.6 ± 0.11<br>(Cisplatin)                 | 75 g/kg   | 150 mg                         | [63] |
| Glaucumolide A (116);<br>glaucumolide B (117)                                                   | <i>Sarcophyton<br/>glaucum</i>   | HL-60<br>CCRF-CEM          | Promyelocytic leukemia<br>T-cell lymphoblastic leukemia                           | Human<br>Human          | 6.6 ± 1.2; 3.8 ± 0.9<br>7.4 ± 1.5; 5.3 ± 1.4     | 10.7 ± 0.5<br>2.30 ± 0.6<br>(Fluorouracil)              | 7.5 g/kg  | 4.4;<br>2.8 mg                 | [64] |
| Sarcophinone (118) and 8-epi-<br>sarcophinone (119)                                             | <i>Sarcophyton<br/>glaucom</i>   | HepG2                      | Hepatocellular carcinoma                                                          | Human                   | 11.32 µg/mL (EC50)<br>(tested together)          | 4.28 µg/mL (EC50)<br>(Doxorubicin)                      | 6.64 g/Kg | 9.1 mg                         | [65] |
| (+)-7α,8β-<br>dihydroxydeepoxysarcophine<br>(115);<br>sinumaximol G (120);<br>sarcophine (121); | <i>Sarcophyton<br/>glaucom</i>   | HepG2                      | Hepatocellular carcinoma                                                          | Human                   | 17.84; 9.97; 10.32<br>µg/mL (EC50)               | 4.28 µg/mL (EC50)<br>(Doxorubicin)                      | 6.64 g/Kg | 52.7 mg; 22.8<br>mg;<br>530 mg | [65] |

Table S1. Cont.

| Compound                    | Species                             | Cells          | Cancer type                                         | Organism       | IC <sub>50</sub> (or ED <sub>50</sub> ) µg/mL or µM | IC <sub>50</sub> (or ED <sub>50</sub> )<br>positive control | Quantity<br>of extract<br>per kg of<br>coral | Absolute<br>quantity of<br>isolated<br>products | Ref. |
|-----------------------------|-------------------------------------|----------------|-----------------------------------------------------|----------------|-----------------------------------------------------|-------------------------------------------------------------|----------------------------------------------|-------------------------------------------------|------|
| (+)-isosarcophytoxide (135) | <i>Sarcophyton<br/>militatensis</i> | HL-60<br>A-549 | Promyelocytic leukemia<br>Lung epithelial carcinoma | Human<br>Human | 0.78 ± 0.21<br>1.26 ± 0.80                          | 0.07<br>0.01<br>(Doxorubicin)                               | 29.4 g/kg<br>(dry<br>weight)                 | 51 mg                                           | [69] |

|                                                                                                                                                                                                                                                                                                                  |                                    |            |                                |       |                                                                                          |                              |           |                              |      |
|------------------------------------------------------------------------------------------------------------------------------------------------------------------------------------------------------------------------------------------------------------------------------------------------------------------|------------------------------------|------------|--------------------------------|-------|------------------------------------------------------------------------------------------|------------------------------|-----------|------------------------------|------|
| 7-Acetyl-8-epi-sinumaximol G ( <b>139</b> );<br>8-epi-Sinumaximol G ( <b>140</b> );<br>12-Acetyl-7, 12-epi- sinumaximol G ( <b>141</b> );<br>12-Hydroxysarcoph-10-ene ( <b>142</b> );<br>8-Hydroxy-epi-sarcophinone ( <b>143</b> );<br>sinumaximol G ( <b>120</b> );<br>sarcophine ( <b>121</b> )                | <i>Sarcophyton</i> sp.             | MCF-7      | Breast carcinoma               | Human | 23.84 ± 0.2; 26.22 ± 0.1; 26.81 ± 0.2; 25.28 ± 0.3; 27.2 ± 0.5; 24.97 ± 0.3; 22.39 ± 0.2 | 12.78 ± 0.3<br>(Doxorubicin) | 100 g/kg  | Not reported                 | [71] |
| Sardigitolide B ( <b>144</b> );<br>glaucumolide A ( <b>116</b> );<br>glaucumolide B ( <b>117</b> )                                                                                                                                                                                                               | <i>Sarcophyton digitatum</i>       | MCF-7      | Breast carcinoma               | Human | 9.6 ± 3.0; 10.1 ± 3.3; 9.4 ± 3.0                                                         | 0.7 ± 0.1                    | 1.22 g/kg | 4.0 mg; 20.2 mg; 13.5 mg     | [72] |
|                                                                                                                                                                                                                                                                                                                  |                                    | MDA-MB-231 | Breast carcinoma               | Human | 14.8 ± 4.0; (-); 17.8 ± 4.5                                                              | 1.3 ± 0.2                    |           |                              |      |
|                                                                                                                                                                                                                                                                                                                  |                                    | HepG2      | Hepatocellular carcinoma       | Human | (-); 14.9 ± 3.5; 14.9 ± 4.2                                                              | 1.2 ± 0.4                    |           |                              |      |
|                                                                                                                                                                                                                                                                                                                  |                                    | HeLa       | Cervical epithelioid carcinoma | Human | (-); 17.1 ± 4.5; (-)                                                                     | 0.4 ± 0.1<br>(Doxorubicin)   |           |                              |      |
| isosarcophytonolide D ( <b>145</b> )                                                                                                                                                                                                                                                                             | <i>Sarcophyton digitatum</i>       | MCF-7      | Breast carcinoma               | Human | 10.9 ± 4.3                                                                               | 0.7 ± 0.1<br>(Doxorubicin)   | 1.22 g/kg | 2.1 mg                       | [72] |
| Sarcotenuhydroquinone ( <b>149</b> );<br>sarcotenusene A ( <b>150</b> );<br>(2S, 7S, 8S)-sarcophytoxide ( <b>151</b> );<br>(2S, 7R, 8R)-sarcophytoxide ( <b>152</b> );<br>sarcophytonin F ( <b>153</b> );<br>3,4-dihydro-4α-hydroxy-Δ <sup>2</sup> -sarcophine ( <b>154</b> );<br>a hydroperoxide ( <b>155</b> ) | <i>Sarcophyton tenuispiculatum</i> | MCF-7      | Breast carcinoma               | Human | 25.3 ± 2.8; 34.3 ± 3.7; 37.6 ± 4.2; 33.3 ± 3.5; 30.1 ± 3.1; 24.3 ± 3.0; 27.2 ± 4.0       | 6.8 ± 1.4                    | 5.1 g/kg  | 3.5 mg; 2 mg; 17.5 mg; 3 mg; | [74] |
|                                                                                                                                                                                                                                                                                                                  |                                    | MDA-MB-231 | Breast carcinoma               | Human | (-); (-); 35.2 ± 4.4; 28.6 ± 3.4; (-); 34.5 ± 4.2; 36.4 ± 5.3                            | 6.3 ± 1.2                    |           | 4.5 mg; 1.2 mg; 3.2 mg       |      |
|                                                                                                                                                                                                                                                                                                                  |                                    | HepG2      | Hepatocellular carcinoma       | Human | 36.4 ± 3.6; (-); (-); (-); 38.6±5.0; (-); (-)                                            | 9.6 ± 1.8<br>(Doxorubicin)   |           |                              |      |
| Sinugibberol ( <b>157</b> )                                                                                                                                                                                                                                                                                      | <i>Sinularia gibberosa</i>         | HT-29      | Colon adenocarcinoma           | Human | 0.5                                                                                      | Not reported                 | 75 g/kg   | 10 mg                        | [77] |
|                                                                                                                                                                                                                                                                                                                  |                                    | P-388      | Lymphocytic leukemia           | Mouse | 11.7                                                                                     |                              |           |                              |      |
| 11,12-epoxy-1(E),3(E),7(E)- cembratrien-15-ol ( <b>158</b> )                                                                                                                                                                                                                                                     | <i>Sinularia gibberosa</i>         | A-549      | Lung epithelial carcinoma      | Human | 1.03                                                                                     | Not reported                 | 80 g/kg   | 40mg                         | [78] |
|                                                                                                                                                                                                                                                                                                                  |                                    | HT-29      | Colon adenocarcinoma           | Human | 0.64                                                                                     |                              |           |                              |      |
|                                                                                                                                                                                                                                                                                                                  |                                    | KB         | Oral epidermoid carcinoma      | Human | 0.63                                                                                     |                              |           |                              |      |
|                                                                                                                                                                                                                                                                                                                  |                                    | P-388      | Lymphocytic leukemia           | Mouse | 0.01                                                                                     |                              |           |                              |      |

Table S1. Cont.

| Compound                                                       | Species                     | Cells  | Cancer type               | Organism | IC <sub>50</sub> (or ED <sub>50</sub> )<br>μg/mL or μM | IC <sub>50</sub> (or ED <sub>50</sub> )<br>positive control | Quantity<br>of extract<br>per kg of<br>coral | Absolute<br>quantity of<br>isolated<br>products | Ref. |
|----------------------------------------------------------------|-----------------------------|--------|---------------------------|----------|--------------------------------------------------------|-------------------------------------------------------------|----------------------------------------------|-------------------------------------------------|------|
| Singardin ( <b>159</b> )                                       | <i>Sinularia gardineri</i>  | P-388  | Lymphocytic leukemia      | Mouse    | 1.0                                                    | Not reported                                                | 4.9 g/kg                                     | 19.5 mg                                         | [79] |
|                                                                |                             | A-549  | Lung epithelial carcinoma | Human    | 2.5                                                    |                                                             |                                              |                                                 |      |
|                                                                |                             | HT-29  | Colon adenocarcinoma      | Human    | 5.0                                                    |                                                             |                                              |                                                 |      |
|                                                                |                             | MEL-28 | Melanoma                  | Human    | 5.0                                                    |                                                             |                                              |                                                 |      |
| Sinuflexolide ( <b>161</b> );<br>sinuflexibilin ( <b>162</b> ) | <i>Sinularia flexibilis</i> | P-388  | Lymphocytic leukemia      | Mouse    | 0.16; 0.27                                             | Not reported                                                | 150 g/kg                                     | 20 mg; 8 mg                                     | [80] |
|                                                                |                             | A-549  | Lung epithelial carcinoma | Human    | 0.68; 0.72                                             |                                                             |                                              |                                                 |      |

|                                                                                                                |                                         |                                  |                                                                                                   |                                  |                                                                |                                               |              |                                          |      |
|----------------------------------------------------------------------------------------------------------------|-----------------------------------------|----------------------------------|---------------------------------------------------------------------------------------------------|----------------------------------|----------------------------------------------------------------|-----------------------------------------------|--------------|------------------------------------------|------|
|                                                                                                                |                                         | HT-29<br>KB                      | Colon adenocarcinoma<br>Oral epidermoid carcinoma                                                 | Human<br>Human                   | 0.39; 0.22<br>0.46; 1.73                                       |                                               |              |                                          |      |
| sarcophytol A (55)                                                                                             | <i>Sinularia</i> sp.                    | P-388                            | Lymphocytic leukemia                                                                              | Mouse                            | 1.3                                                            | Not reported                                  | 2.4 g/Kg     | Not reported                             | [81] |
| Sinulariolide (165);<br>flexibilide (166);<br>9-Acetoxy-5,8:12,13-diepoxyce-mbr-<br>15(17)-en-16,4-olide (167) | <i>Sinularia</i><br><i>capillosa</i>    | P-388<br>L1210                   | Lymphocytic leukemia<br>Lymphocytic leukemia                                                      | Mouse<br>Mouse                   | 8.5; 1.5; 2.5<br>10; 3.0; 5.0                                  | Not reported                                  | Not reported | 15 mg;<br>100 mg;<br>20 mg               | [82] |
| Leptocladolide A (177);                                                                                        | <i>Sinularia</i><br><i>parva</i>        | KB<br>Hepa59T/VGH                | Oral epidermoid carcinoma<br>Liver carcinoma                                                      | Human<br>Human                   | 5.9;<br>2.6;                                                   | Not reported                                  | 4.2 g/kg     | 0.8 mg;                                  | [86] |
| Scabrolide E (179)                                                                                             | <i>Sinularia</i><br><i>scabra</i>       | KB<br>Hepa59T/VGH                | Oral epidermoid carcinoma<br>Liver carcinoma                                                      | Human<br>Human                   | 0.7<br>0.5                                                     | Not reported                                  | Not reported | 8.0 mg                                   | [88] |
| Capillolide (168)                                                                                              | <i>Sinularia</i><br><i>microclavata</i> | A-549                            | Lung epithelial carcinoma                                                                         | Human                            | 0.5                                                            | Not reported                                  | 14.3 g/kg    | 30 mg                                    | [90] |
| Sinularolide B (8);<br>sinularolide C (10);<br>sinularolide D (183);<br>sinularolide E (184)                   | <i>Sinularia</i><br><i>gibberosa</i>    | HL-60<br>BGC-823<br>MDA-MB-435   | Promyelocytic leukemia<br>Gastric carcinoma<br>Breast carcinoma                                   | Human<br>Human<br>Human          | 5.2; 5.1; 2.3; 6.0<br>6.3; 5.2; 6.1; 8.6<br>8.0; 7.7; (-); 2.1 | Not reported                                  | 22 g/kg      | 100 mg;<br>48.1 mg;<br>5.0 mg;<br>2.0 mg | [91] |
| Manaarenolide G (185);<br>manaarenolide H (186)                                                                | <i>Sinularia</i><br><i>manaarensis</i>  | Hepa59T/VGH<br>KB<br>Hela<br>Med | Liver carcinoma<br>Oral epidermoid carcinoma<br>Cervical epithelioid carcinoma<br>Medulloblastoma | Human<br>Human<br>Human<br>Human | 7.2; 4.4<br>8.7; 7.6<br>10.9; 9.3<br>13.4; 5.8                 | Not reported                                  | 9.2 g/kg     | 2.5 mg;<br>2.9 mg                        | [93] |
| Flexilarin D (196);<br>11-dehydrosinulariolide (197)                                                           | <i>Sinularia</i><br><i>flexibilis</i>   | HeLa<br>Daoy<br>Hep2<br>MCF-7    | Cervical epithelioid carcinoma<br>Medulloblastoma<br>Hepatocarcinoma<br>Breast adenocarcinoma     | Human<br>Human<br>Human<br>Human | 0.41; 3.04<br>1.24; 2.46<br>0.07; 1.58<br>1.24; 3.14           | 0.08<br>0.06<br>0.06<br>0.09<br>(Mitomycin-C) | 6.9 g/kg     | 5 mg;<br>34 mg                           | [99] |

Table S1. Cont.

| Compound                                                                                         | Species                               | Cells           | Cancer type                 | Organism       | IC <sub>50</sub> (or ED <sub>50</sub> ) µg/mL or<br>µM | IC <sub>50</sub> (or ED <sub>50</sub> ) positive<br>control | Quantity of<br>extract per kg<br>of coral | Absolute<br>quantity of<br>isolated<br>products | Ref.  |
|--------------------------------------------------------------------------------------------------|---------------------------------------|-----------------|-----------------------------|----------------|--------------------------------------------------------|-------------------------------------------------------------|-------------------------------------------|-------------------------------------------------|-------|
| Flexibilisolide C (201);<br>11-dehydrosinulariolide (197);<br>11-epi-sinulariolide acetate (202) | <i>Sinularia</i><br><i>flexibilis</i> | B-16            | Melanoma                    | Human          | 10.9 ± 0.7;<br>12.5 ± 0.5;<br>12.1 ± 0.8               | 9.9 ± 0.8<br>(5-Fluorouracil)                               | 38.7 g/ kg<br>(dry weight)                | 1.2 mg;<br>140 mg; 1230<br>mg                   | [103] |
| 14-deoxycrassin (44)                                                                             | <i>Sinularia</i><br><i>flexibilis</i> | SK-Hep1<br>B-16 | Liver carcinoma<br>Melanoma | Human<br>Human | 5.7 ± 0.8<br>6.0 ± 0.5                                 | 3.4 ± 0.2<br>9.9 ± 0.8<br>(5-Fluorouracil)                  | 31 g/kg (dry<br>weight)                   | 2.1 mg                                          | [103] |

|                                                                                                                                                        |                       |            |                                                  |       |                                                        |                               |                            |                 |       |
|--------------------------------------------------------------------------------------------------------------------------------------------------------|-----------------------|------------|--------------------------------------------------|-------|--------------------------------------------------------|-------------------------------|----------------------------|-----------------|-------|
| 5-episinuleptolide acetate (207)                                                                                                                       | Sinularia sp.         | K-562      | Chronic myelogenous leukemia                     | Human | 0.67                                                   | 0.15                          | 8.8 g/kg                   | 29.5 mg         | [107] |
|                                                                                                                                                        |                       | MOLT-4     | Acute lymphoblastic leukemia                     | Human | 0.59                                                   | 0.01                          |                            |                 |       |
|                                                                                                                                                        |                       | HTC-116    | Acute promyelocytic leukemia                     | Human | 4.09                                                   | 1.11                          |                            |                 |       |
|                                                                                                                                                        |                       | DLD-1      | Colorectal adenocarcinoma                        | Human | 0.92                                                   | 0.22                          |                            |                 |       |
|                                                                                                                                                        |                       | T-47       | Breast ductal carcinoma                          | Human | 3.09                                                   | 0.40                          |                            |                 |       |
|                                                                                                                                                        |                       | MDA-MB-231 | Breast adenocarcinoma                            | Human | 2.95                                                   | 1.30                          |                            |                 |       |
|                                                                                                                                                        |                       |            |                                                  |       |                                                        | (Doxorubicin)                 |                            |                 |       |
| durumolide C (211)                                                                                                                                     | Sinularia polydactyla | Hep G2     | Hepatocellular carcinoma                         | Human | 1.0                                                    | 1.2 (Doxorubicin)             | Not reported               | Not reported    | [110] |
|                                                                                                                                                        |                       | HCT        | Colonic carcinoma                                | Human | 11.7                                                   | 4.6 (Vinblastine)             |                            |                 |       |
|                                                                                                                                                        |                       | Hep2       | Epidermoid larynx carcinoma                      | Human | 10.7                                                   | 2.6 (Vinblastine)             |                            |                 |       |
| Sinulariaoid A (215);<br>sinularin (205)                                                                                                               | Sinularia sp.         | HepG2/ADM  | Hepatocellular carcinoma<br>multidrug-resistance | Human | 9.70 ± 1.77; 28.88 ± 4.6<br>16.95 ± 1.82; 23.72 ± 1.38 | 38.32 ± 6.13                  | 117.4 g/kg<br>(dry weight) | 200 mg;<br>8 mg | [116] |
|                                                                                                                                                        |                       | MCF-7/ADM  | Breast carcinoma multidrug-<br>resistance        | Human |                                                        | 27.05 ± 2.98<br>(Doxorubicin) |                            |                 |       |
| 4α-hydroxy-5-episinuleptolide (216)                                                                                                                    | Sinularia numerosa    | CCRF-CEM   | T-cell lymphoblastic leukemia                    | Human | 4.21                                                   | 0.01<br>(Doxorubicin)         | 10.3 g/kg                  | 2.8 mg          | [117] |
| sinulerectadione (227)                                                                                                                                 | Sinularia erecta      | K-562      | Chronic myelogenous leukemia                     | Human | 8.6 ± 1.1                                              | 33 ± 9                        | 6.4 g/kg                   | 9.0 mg          | [122] |
|                                                                                                                                                        |                       | MOLT-4     | Acute lymphoblastic leukemia                     | Human | 9.7 ± 2.9                                              | 6.9 ± 1.5<br>(5-Fluorouracil) |                            |                 |       |
| Sinulerectol C (229)                                                                                                                                   | Sinularia erecta      | K-562      | Chronic myelogenous leukemia                     | Human | 9.2 ± 3.3                                              | 33 ± 9<br>(5-Fluorouracil)    | 6.4 g/kg                   | 1.2 mg          | [122] |
| 11-epi-sinulariolide acetate (202)                                                                                                                     | Sinularia flexibilis  | P-388      | Lymphocytic leukemia                             | Mouse | 6.9                                                    | 0.3                           | Not reported               | 84.5 mg         | [135] |
|                                                                                                                                                        |                       | K-562      | Chronic myelogenous leukemia                     | Human | 12.2                                                   | 1.0                           |                            |                 |       |
|                                                                                                                                                        |                       | HT-29      | Colonic carcinoma                                | Human | 9.6                                                    | 0.9                           |                            |                 |       |
|                                                                                                                                                        |                       |            |                                                  |       | (Dox. hydrochloride)                                   |                               |                            |                 |       |
| Klyflaccicembranol B (314);<br>klyflaccicembranol D (215);<br>klyflaccicembranol F (316);<br>klyflaccicembranol H (317);<br>klyflaccicembranol I (318) | Klyxum flaccidum      | A-549      | Lung epithelial carcinoma                        | Human | 16.5; (-); 21.4; 49.4; (-)                             | 110                           | 15 g/kg                    | 1.5 mg;         | [167] |
|                                                                                                                                                        |                       | K-562      | Chronic myelogenous leukemia                     | Human | 34.6; 44.9; (-); 47.4; (-)                             | 31.5                          |                            | 10.2 mg;        |       |
|                                                                                                                                                        |                       | P-388      | Lymphocytic leukemia                             | Mouse | (-); (-); (-); 34.6; 25.9                              | 5.5                           |                            | 2.1 mg;         |       |
|                                                                                                                                                        |                       |            |                                                  |       | (5-Fluorouracil)                                       |                               |                            | 3.2 mg;         |       |
|                                                                                                                                                        |                       |            |                                                  |       |                                                        |                               |                            | 40.5 mg         |       |

**Table S2.** Other active terpenes, isolated from Alcyoniidae.

| Compound                                                                  | Type                           | Species                                 | Cells                             | Cancer type                                                                           | Organism                         | IC <sub>50</sub> (or ED <sub>50</sub> )<br>µg/mL or µM | IC <sub>50</sub> (or ED <sub>50</sub> )<br>positive control | Quantity<br>of extract<br>per kg of<br>coral | Absolute<br>quantity of<br>isolated<br>products | Ref. |
|---------------------------------------------------------------------------|--------------------------------|-----------------------------------------|-----------------------------------|---------------------------------------------------------------------------------------|----------------------------------|--------------------------------------------------------|-------------------------------------------------------------|----------------------------------------------|-------------------------------------------------|------|
| Lobophytene (12)                                                          | Squalene-type<br>triterpene    | <i>Lobophytum</i><br>sp.                | A-549<br>HT-29                    | Lung epithelial carcinoma<br>Colon adenocarcinoma                                     | Human<br>Human                   | 8.2; 5.1<br>5.6; 1.8                                   | 6.1<br>6.5<br>(Mitoxantrone)                                | 26.5 g/kg                                    | 3.5 mg                                          | [27] |
| Cyclolobatriene (19);<br>lobatriene (20);<br>eunicol (21);<br>fuscol (22) | Diterpenes                     | <i>Lobophytum</i><br><i>pauciflorum</i> | A-431                             | Epidermoid carcinoma                                                                  | Human                            | 0.64; 0.41; 0.35; 0.52                                 | Not reported                                                | 4.9 g/kg                                     | 7.8 mg;<br>1.2 mg;<br>0.5 mg;<br>1.8 mg         | [31] |
| Methyl tortuate A (65);<br>methyl tortuate B (27)                         | Tetracyclic<br>tetraterpenoids | <i>Sarcophyton</i><br><i>tortuosum</i>  | P-388                             | Lymphocytic leukemia                                                                  | Mouse                            | 3.5; 5.0                                               | Not reported                                                | Not<br>reported                              | 13 mg;<br>18 mg                                 | [48] |
| 10(14)aromadendrene (114)                                                 | Sesquiterpene                  | <i>Sarcophyton</i><br><i>glaucum</i>    | PC-3                              | Prostate cancer                                                                       | Human                            | 9.3 ± 0.146                                            | 0.50 ± 0.014<br>(Doxorubicin)                               | 6.7 g/kg                                     | 15 mg                                           | [62] |
| prostantherol (122)                                                       | Sesquiterpene                  | <i>Sarcophyton</i><br><i>glaucum</i>    | HepG2                             | Hepatocellular carcinoma                                                              | Human                            | 12.22 µg/mL<br>(EC <sub>50</sub> )                     | 4.28 µg/mL (EC <sub>50</sub> )<br>(Doxorubicin)             | 6.64 g/Kg                                    | 22.2 mg                                         | [65] |
| guaianediol (160)                                                         | Sesquiterpene                  | <i>Sinularia</i><br><i>gardineri</i>    | P-388<br>A-549<br>HT-29<br>MEL-28 | Lymphocytic leukemia<br>Lung epithelial carcinoma<br>Colon adenocarcinoma<br>Melanoma | Mouse<br>Human<br>Human<br>Human | 1.0<br>2.5<br>5.0<br>5.0                               | Not reported                                                | 4.9 g/kg                                     | 16 mg                                           | [79] |
| 1β-hydroxy-α-cyperone (164)                                               | Sesquiterpene                  | <i>Sinularia</i> sp.                    | P-388                             | Lymphocytic leukemia                                                                  | Mouse                            | 22.9                                                   | Not reported                                                | 2.4 g/Kg                                     | Not<br>reported                                 | [81] |
| Norditerpene 6 (173);<br>norditerpene 7 (174)                             | Norditerpenes                  | <i>Sinularia</i><br><i>scabra</i>       | KB<br>Hepa59/VGH                  | Oral epidermoid carcinoma<br>Liver carcinoma                                          | Human<br>Human                   | 2.5; 2.3<br>2.6; 2.4                                   | 0.3<br>0.3<br>(Doxorubicin)                                 | 19.9 g/kg                                    | 1.5 mg;<br>5 mg                                 | [85] |
| Nanolobatin A (180);<br>nanolobatinB (181)                                | Norsesquiterpe-<br>noids       | <i>Sinularia</i><br><i>nanolobata</i>   | KB<br>Hepa59T/VGH                 | Oral epidermoid carcinoma<br>Liver carcinoma                                          | Human<br>Human                   | 7.3; 7.6<br>4.6; 8.3                                   | 0.25<br>0.47<br>(Doxorubicin)                               | 8 g/kg                                       | 5.8 mg;<br>11.4 mg                              | [89] |
| 1(5),6(7)-diepoxy-4-guaiol<br>(187);<br>4,10-guaianediol (188)            | Sesquiterpenes                 | <i>Sinularia</i> sp.                    | B-16<br>HT-29                     | Melanoma<br>Colonic carcinoma                                                         | Mouse<br>Human                   | 1.2; 2.2<br>3.5; 4.7                                   | Not reported                                                | 117 g/kg<br>(dry<br>weight)                  | 20 mg;<br>6 mg                                  | [94] |
| Gibberosin K (192);<br>gibberosin L (193)                                 | Terpenoids                     | <i>Sinularia</i><br><i>gibberosa</i>    | MDA-MB-231                        | Breast carcinoma                                                                      | Human                            | 5.5; 7.7                                               | Not reported                                                | 11.8 g/kg                                    | 3.8 mg;<br>14.6 mg                              | [97] |

Table S2. Cont.

| Compound                                              | Type                          | Species                     | Cells                                     | Cancer type                                                                                                                        | Organism                                  | IC <sub>50</sub> (or ED <sub>50</sub> )<br>μg/mL or μM                                                                         | IC <sub>50</sub> (or ED <sub>50</sub> )<br>positive control           | Quantity of extract per kg of coral | Absolute quantity of isolated products | Ref.  |
|-------------------------------------------------------|-------------------------------|-----------------------------|-------------------------------------------|------------------------------------------------------------------------------------------------------------------------------------|-------------------------------------------|--------------------------------------------------------------------------------------------------------------------------------|-----------------------------------------------------------------------|-------------------------------------|----------------------------------------|-------|
| 3β,5α-dihydroxyeudesma-4(15),11-diene (245)           | Sesquiterpenoid               | <i>Sinularia erecta</i>     | A-549                                     | Lung epithelial carcinoma                                                                                                          | Human                                     | 14.79 ± 0.91                                                                                                                   | 11.42 ± 0.13 (Camptothecin)                                           | 100 g/kg                            | 1.5 mg                                 | [128] |
| Gibberosin J (251)                                    | Tetranorditerpenoid           | <i>Sinularia nanolobata</i> | P-388<br>A-549<br>HT-29                   | Lymphocytic leukemia<br>Chronic myelogenous leukemia<br>Colonic carcinoma                                                          | Mouse<br>Human<br>Human                   | 1.0<br>1.2<br>0.5                                                                                                              | Not reported                                                          | 10 g/kg                             | 5.0 mg                                 | [132] |
| Australin B (262)                                     | Eunicellin-based diterpenoid  | <i>Cladiella australis</i>  | MDA-MB-231<br>MCF-7<br>HepaG2/D<br>MEM-12 | Breast adenocarcinoma<br>Breast carcinoma<br>Liver carcinoma                                                                       | Human<br>Human<br>Human                   | 6.4<br>8.6<br>2.4                                                                                                              | Not reported                                                          | 14.7 g/kg                           | 3.5 mg                                 | [142] |
| Hirsutalin E (266)                                    | Eunicellin-based diterpenoid  | <i>Cladiella hirsuta</i>    | Hep G2                                    | Hepatocellular carcinoma                                                                                                           | Human                                     | 4.7                                                                                                                            | 0.4 (Doxorubicin)                                                     | 10.6 g/kg                           | 31.8 mg                                | [144] |
| Cladielloide B (268)                                  | Eunicellin-type diterpenoid   | <i>Cladiella</i> sp.        | CCRF-CEM<br>DLD-1                         | T-cell lymphoblastic leukemia<br>Colorectal adenocarcinoma                                                                         | Human<br>Human                            | 4.7<br>10.2                                                                                                                    | 0.18<br>0.09 (Doxorubicin)                                            | Not reported                        | 2.4 mg                                 | [145] |
| Cladieunicellin B (269)                               | Eunicellin-type diterpenoid   | <i>Cladiella</i> sp.        | DLD-1                                     | Colorectal adenocarcinoma                                                                                                          | Human                                     | 2.0                                                                                                                            | 0.09 (Doxorubicin)                                                    | Not reported                        | 1.3 mg                                 | [146] |
| Cladieunicellin E (270)                               | Eunicellin-type diterpenoid   | <i>Cladiella</i> sp.        | HL-60                                     | Promyelocytic leukemia                                                                                                             | Human                                     | 2.7                                                                                                                            | 0.03 (Doxorubicin)                                                    | Not reported                        | 2.6 mg                                 | [146] |
| 6-acetoxy lithophynin E (275);<br>lithophynin F (276) | Eunicellin-based diterpenoids | <i>Cladiella krempfi</i>    | A-549<br>BT-483<br>H1299<br>Hep G2<br>SAS | Lung epithelial carcinoma<br>Breast carcinoma<br>Lung adenocarcinoma<br>Hepatocellular carcinoma<br>Tongue squamous cell carcinoma | Human<br>Human<br>Human<br>Human<br>Human | 6.80 ± 1.0; 12.2 ± 1.1<br>11.6 ± 2.8; 6.80 ± 0.6<br>6.70 ± 0.7; 12.8 ± 1.2<br>8.50 ± 1.3; 11.1 ± 0.4<br>9.50 ± 3.7; 10.3 ± 0.5 | 1.5 ± 0.9<br>3.9 ± 0.8<br>1.2 ± 0.1<br>1.4 ± 0.7<br>2.3 ± 1.5 (Taxol) | 13.1 g/kg                           | 30.2 mg;<br>5.4 mg                     | [149] |
| Cladieunicellin I (277)                               | Eunicellin diterpenoid        | <i>Cladiella</i> sp.        | DLD-1                                     | Colorectal adenocarcinoma                                                                                                          | Human                                     | 1.59                                                                                                                           | 10.98 (Doxorubicin)                                                   | 27.1 g/kg (dry weight)              | 0.7 mg                                 | [150] |



Table S2. Cont.

| Compound                                      | Type                                  | Species                      | Cells      | Cancer type                      | Organism | IC <sub>50</sub> (or ED <sub>50</sub> )<br>μg/mL or μM | IC <sub>50</sub> (or ED <sub>50</sub> )<br>positive control | Quantity of<br>extract per kg<br>of coral | Absolute<br>quantity of<br>isolated<br>products | Ref.  |
|-----------------------------------------------|---------------------------------------|------------------------------|------------|----------------------------------|----------|--------------------------------------------------------|-------------------------------------------------------------|-------------------------------------------|-------------------------------------------------|-------|
| Cladieunicellin J (282)                       | 6-hydroxyeunicellin-based diterpenoid | <i>Cladiella</i> sp.         | K-562      | Erythromyeloblastoid leukemia    | Human    | 10.9                                                   | Not reported                                                | 9.9 g/kg                                  | 1.4 mg                                          | [152] |
|                                               |                                       |                              | MOLT-4     | Acute lymphoblastic leukemia     | Human    | 6.6                                                    |                                                             |                                           |                                                 |       |
|                                               |                                       |                              | CCRF-CEM   | T-cell lymphoblastic leukemia    | Human    | 4.3                                                    |                                                             |                                           |                                                 |       |
|                                               |                                       |                              | DLD-1      | Colorectal adenocarcinoma        | Human    | 13.4                                                   |                                                             |                                           |                                                 |       |
| Hirsutalin R (283)                            | Eunicellin-type compound              | <i>Cladiella hirsuta</i>     | P-388      | Leukemia                         | Mouse    | 13.8                                                   | 8.50                                                        | 10.6 g/kg                                 | 1.4 mg                                          | [154] |
|                                               |                                       |                              | K-562      | Erythron myeloblastoid leuykemia | Human    | 36.3                                                   | 24.6<br>(5-Fluorouracil)                                    |                                           |                                                 |       |
| Cladieunicellin S (288)                       | Eunicellin-type diterpenoid           | <i>Cladiella tuberculosa</i> | MOLT-4     | Acute lymphoblastic leukemia     | Human    | 6.04                                                   | 0.01                                                        | 10 g/kg                                   | 1.2 mg                                          | [156] |
|                                               |                                       |                              | K-562      | Erythromyeloblastoid leukemia    | Human    | 6.80                                                   | 0.15                                                        |                                           |                                                 |       |
|                                               |                                       |                              | SUP-T1     | T-cell lymphoblastic lymphoma    | Human    | 6.90                                                   | 0.02<br>(Doxorubicin)                                       |                                           |                                                 |       |
| Klysimplexin B (295);<br>klysimplexin H (296) | Eunicellin-based diterpenoids         | <i>Klyxum simplex</i>        | Hep G2     | Hepatocellular carcinoma         | Human    | 3.0; 5.6                                               | Not reported                                                | 10.1 g/kg                                 | 1.1 mg;<br>1.0 mg                               | [159] |
|                                               |                                       |                              | Hep 3B     | Hepatocellular carcinoma         | Human    | 3.6; 6.9                                               |                                                             |                                           |                                                 |       |
|                                               |                                       |                              | MDA-MB-231 | Breast carcinoma                 | Human    | 6.9; 4.4                                               |                                                             |                                           |                                                 |       |
|                                               |                                       |                              | MCF-7      | Breast carcinoma                 | Human    | 3.0; 5.6                                               |                                                             |                                           |                                                 |       |
|                                               |                                       |                              | A-549      | Lung epithelial carcinoma        | Human    | 2.0; 2.8                                               |                                                             |                                           |                                                 |       |
|                                               |                                       |                              | Ca9-22     | Gingival carcinoma               | Human    | 1.8; 6.1                                               |                                                             |                                           |                                                 |       |
| Simplexin R (300)                             | Eunicellin-based diterpene            | <i>Klyxum simplex</i>        | K-562      | Chronic myelogenous leukemia     | Human    | 7.20 ± 2.4                                             | 2.3 ± 0.2                                                   | 10.9 g/kg                                 | 0.9 mg                                          | [161] |
|                                               |                                       |                              | CCRF-CEM   | T-cell lymphoblastic leukemia    | Human    | 2.70 ± 0.1                                             | 1.8 ± 0.3                                                   |                                           |                                                 |       |
|                                               |                                       |                              | T-47D      | Breast carcinoma                 | Human    | 13.5 ± 2.8                                             | 9.8 ± 1.5                                                   |                                           |                                                 |       |
|                                               |                                       |                              | MOLT-4     | Acute lymphoblastic leukemia     | Human    | 3.80 ± 0.5                                             | 2.3 ± 0.3<br>(5-Fluorouracil)                               |                                           |                                                 |       |
| Klymollin M (302)                             | Eunicellin-based diiterpenoids        | <i>Klyxum molle</i>          | K-562      | Chronic myelogenous leukemia     | Human    | 7.97 ± 2.55                                            | 16.22 ± 1.77                                                | Not reported                              | 3.4 mg                                          | [162] |
|                                               |                                       |                              | MOLT-4     | Acute lymphoblastic leukemia     | Human    | 4.35 ± 0.63                                            | 15.07 ± 1.61                                                |                                           |                                                 |       |
|                                               |                                       |                              | T-47D      | Breast carcinoma                 | Human    | 8.58 ± 1.72                                            | 50.20 ± 13.22<br>(5-Fluorouracil)                           |                                           |                                                 |       |
| Flaccidenol A (321)                           | Capnosane-based diterpenoid           | <i>Klyxum flaccidum</i>      | A-549      | Lung epithelial carcinoma        | Human    | 9.7 ± 1.2                                              | 0.3 ± 0.1                                                   | 15 g/kg                                   | 1.5 mg                                          | [169] |
|                                               |                                       |                              | DLD-1      | Colorectal adenocarcinoma        | Human    | 6.0 ± 0.4                                              | 1.5 ± 0.2                                                   |                                           |                                                 |       |
|                                               |                                       |                              | P-388D1    | Lymphocytic leukemia             | Mouse    | 7.2 ± 1.8                                              | 0.9 ± 0.2<br>(Doxorubicin)                                  |                                           |                                                 |       |

Table S3. Most active steroids isolated from Alcyoniidae.

| Compound | Type | Species | Cells | Cancer type | Organism | IC <sub>50</sub> (or ED <sub>50</sub> )<br>μg/mL or μM | IC <sub>50</sub> (or ED <sub>50</sub> )<br>positive control | Quantity<br>of extract<br>per kg of<br>coral | Absolute<br>quantity of<br>isolated<br>products | Ref. |
|----------|------|---------|-------|-------------|----------|--------------------------------------------------------|-------------------------------------------------------------|----------------------------------------------|-------------------------------------------------|------|
|----------|------|---------|-------|-------------|----------|--------------------------------------------------------|-------------------------------------------------------------|----------------------------------------------|-------------------------------------------------|------|

|                                                                                                                                                        |                          |                                    |                               |                                                                                                       |                                  |                                                                   |                                                       |                         |                                |       |
|--------------------------------------------------------------------------------------------------------------------------------------------------------|--------------------------|------------------------------------|-------------------------------|-------------------------------------------------------------------------------------------------------|----------------------------------|-------------------------------------------------------------------|-------------------------------------------------------|-------------------------|--------------------------------|-------|
| Lobophytosterol ( <b>15</b> )                                                                                                                          | Sterol                   | <i>Lobophytum laevigatum</i>       | HTC-116<br>A-549<br>HL-60     | Colon carcinoma<br>Lung carcinoma<br>Promyelocytic leukemia                                           | Human<br>Human<br>Human          | 3.2 ± 0.9<br>4.5 ± 0.5<br>5.6 ± 0.4                               | 7.2 ± 0.3<br>7.8 ± 0.4<br>8.2 ± 0.9<br>(Mitoxantrone) | 40 g/kg                 | 15 mg                          | [29]  |
| (22S,24S)-24-methyl-22,25-epoxyfurost-5-ene-3β,20β-diol ( <b>16</b> );<br>(24S)-24-methylcholest-5-ene-3β,25-diol ( <b>17</b> )                        | Sterols                  | <i>Lobophytum laevigatum</i>       | HTC-116                       | Colon carcinoma                                                                                       | Human                            | 6.90 ± 0.8;<br>18.1 ± 1.2                                         | 7.2 ± 0.3<br>(Mitoxantrone)                           | 40 g/kg                 | 6 mg;<br>18 mg                 | [29]  |
| 3β,11-dihydroxy-24-methylene-9,11-secocholestan-5-en-9-one ( <b>23</b> )                                                                               | Sterol                   | <i>Lobophytum compactum</i>        | A-549                         | Lung epithelial carcinoma                                                                             | Human                            | 4.97 ± 0.06                                                       | 7.83 ± 0.04<br>(Mitoxantrone)                         | 7 g/kg                  | 23 mg                          | [32]  |
| (24S)-24-methylcholestane-3β,5α,6β-triol ( <b>59</b> );<br>24ξ-methylcholestane-3β,5α,6β,25-tetraol-25-monoacetate ( <b>60</b> )                       | Steroids                 | <i>Sarcophyton crassocaule</i>     | A-549<br>HT-29<br>KB<br>P-388 | Lung epithelial carcinoma<br>Colon adenocarcinoma<br>Epidermoid carcinoma<br>Lymphocytic leukemia     | Human<br>Human<br>Human<br>Mouse | 6.26; (–)<br>8.35; 4.32<br>5.38; (–)<br>0.14; 3.96                | Not reported                                          | 71.4 g/kg               | Not reported                   | [45]  |
| 23,24-dimethylcholest-16(17)-E-ene-3β,5α,6β,20(S)-tetraol ( <b>61</b> )                                                                                | Polyhydroxy-sterol       | <i>Sarcophyton trocheliophorum</i> | HL-60<br>M-14<br>MCF-7        | Promyelocytic leukemia<br>Skin melanoma<br>Breast carcinoma                                           | Human<br>Human<br>Human          | 2.8<br>4.3<br>4.9                                                 | Not reported                                          | 12.8 g/kg               | 6 mg                           | [46]  |
| (24S)-Ergostane-3β,5α,6β,25 tetraol ( <b>146</b> )                                                                                                     | Polyhydroxylated sterol  | <i>Sarcophyton acutum</i>          | HepG2                         | Hepatocellular carcinoma                                                                              | Human                            | 17.2 ± 1.5                                                        | 17.6 ± 0.2<br>(Etoposide)                             | 17.6 g/kg               | 2.7 mg                         | [73]  |
| Acutumosterol A ( <b>147</b> );<br>sarcoaldosterol B ( <b>148</b> )                                                                                    | Polyhydroxylated sterols | <i>Sarcophyton acutum</i>          | MCF-7<br><br>A-549            | Breast carcinoma<br><br>Lung epithelial carcinoma                                                     | Human<br><br>Human               | 28.8 ± 1.9;<br>30.2 ± 4.0<br>27.4 ± 1.2;<br>24.8 ± 2.8            | 33.6 ± 4.8<br><br>21.5 ± 4.5<br>(Etoposide)           | 17.6 g/kg               | 2.2 mg;<br>9 mg                | [74]  |
| (22R,23R,24R)-5α,8α-epidioxy-22,23-methylene-24-methylcholest-6-en-3β-ol ( <b>170</b> );<br>numersterol ( <b>171</b> );<br>pregnenolone ( <b>172</b> ) | Sterols                  | <i>Sinularia</i> sp.               | P-388<br>A-549<br>HT-29<br>KB | Lymphocytic leukemia<br>Lung epithelial carcinoma<br>Colon adenocarcinoma<br>Oral pidermoid carcinoma | Mouse<br>Human<br>Human<br>Human | 0.4; 8.3; 7.8<br>2.7; 10.8; 8.6<br>1.4; 1.5; 0.7<br>2.1; 1.9; (–) | Not reported                                          | 2.5 g/kg                | 1.7 mg;<br>18.5 mg;<br>10.2 mg | [84]  |
| Sinugrandisterol A ( <b>190</b> );<br>sinugrandisterol B ( <b>191</b> )                                                                                | Trihydroxy-steroids      | <i>Sinularia grandilobata</i>      | Hep G2                        | Hepatocellular carcinoma                                                                              | Human                            | 9.1; 6.8                                                          | 0.40<br>(Doxorubicin)                                 | 33.3 g/kg               | 12.9 mg;<br>1.8 mg             | [96]  |
| 24-methylenecholestane-3β,5α,6β-triol-6-monoacetate ( <b>210</b> )                                                                                     | polyoxygenated sterol    | <i>Sinularia</i> sp.               | K-562                         | Chronic myelogenous leukemia                                                                          | Human                            | 3.18                                                              | Not reported                                          | 50 g/kg<br>(dry weight) | 27.8 mg                        | [109] |
| Crassarosterol A ( <b>204</b> )                                                                                                                        | Steroid                  | <i>Sinularia arborea</i>           | K-562<br>MOLT-4               | Chronic myelogenous leukemia<br>Acute lymphoblastic leukemia                                          | Human<br>Human                   | 2.5<br>0.7                                                        | 0.3<br>0.001<br>(Doxorubicin)                         | 7.8 g/kg                | 1.2 mg                         | [114] |

Table S3. Cont.

| Compound                                                                                                                                | Species                       | Cells                             | Cancer type                                                                                               | Organism                         | IC <sub>50</sub> (or ED <sub>50</sub> ) µg/mL<br>or µM                                             | IC <sub>50</sub> (or ED <sub>50</sub> )<br>positive control           | Quantity<br>of extract<br>per kg of<br>coral | Absolute<br>quantity of<br>isolated<br>products | Ref.  |
|-----------------------------------------------------------------------------------------------------------------------------------------|-------------------------------|-----------------------------------|-----------------------------------------------------------------------------------------------------------|----------------------------------|----------------------------------------------------------------------------------------------------|-----------------------------------------------------------------------|----------------------------------------------|-------------------------------------------------|-------|
| Sinubrasolide H ( <b>233</b> );<br>sinubrasolide J ( <b>234</b> );<br>sinubrasolide K ( <b>235</b> );<br>sinubrasolide A ( <b>236</b> ) | <i>Sinularia<br/>brassica</i> | P-388<br>MOLT-4<br>K-562<br>HT-29 | Lymphocytic leukemia<br>Acute lymphoblastic leukemia<br>Chronic myelogenous leukemia<br>Colonic carcinoma | Mouse<br>Human<br>Human<br>Human | (–); 18.7; 18.3; 29.9<br>28.6; 17.2; 13.7; 12.1<br>29.7; 12.6; 17.4; 8.7<br>24.4; 11.2; 20.5; 18.7 | 5.8 ± 0.6<br>6.2 ± 1.0<br>30.5 ± 6.3<br>7.2 ± 0.7<br>(5-Fluorouracil) | 9.3 g/kg                                     | 3.0 mg;<br>2.1 mg;<br>0.7 mg;<br>not reported   | [125] |

|                                                                                                                                                                                                                                                                                                                                                                      |                              |         |                                 |       |                                           |                                    |                               |                                                               |       |
|----------------------------------------------------------------------------------------------------------------------------------------------------------------------------------------------------------------------------------------------------------------------------------------------------------------------------------------------------------------------|------------------------------|---------|---------------------------------|-------|-------------------------------------------|------------------------------------|-------------------------------|---------------------------------------------------------------|-------|
| Sinubrasione <b>(238)</b> ;<br>ergosta-1 $\alpha$ ,3 $\beta$ ,5 $\alpha$ ,6 $\beta$ ,11 $\alpha$ -pentaol <b>(239)</b> ;<br>sarcosterol B <b>(130)</b> ;<br>ergosta-1 $\beta$ ,3 $\beta$ ,5 $\alpha$ ,6 $\beta$ -tetraol <b>(241)</b> ;<br>ergosta-3 $\beta$ ,5 $\alpha$ ,6 $\beta$ -triol <b>(237)</b> ; pregnedioside A <b>(240)</b>                               | <i>Sinularia brassica</i>    | A-549   | Lung epithelial carcinoma       | Human | 23.27–47.46                               | 12.65 $\pm$ 1.01<br>(Camptothecin) | 34.3 g/kg                     | 1.2 mg;<br>1.6 mg;<br>1.5 mg;<br>1.6 mg;<br>3.7 mg;<br>1.6 mg | [126] |
|                                                                                                                                                                                                                                                                                                                                                                      |                              | Hela    | Cervical epitheloid carcinoma   | Human | (–); 16.59– 81.51                         | 27.99 $\pm$ 2.01<br>(Etoposide)    |                               |                                                               |       |
|                                                                                                                                                                                                                                                                                                                                                                      |                              | PANC-1  | Pancreatic epitheloid carcinoma | Human | 15.24; 22.47; (–);<br>15.39; 20.51; 38.12 | 1.170 $\pm$ 0.42<br>(Etoposide)    |                               |                                                               |       |
| Ergost-24(28)-ene-3, 5, 6-triol, (3 $\beta$ , 5 $\alpha$ , 6 $\beta$ )-tri-<br>ol <b>(242)</b> ;<br>ergost-24(28)-ene-1, 3, 5, 6, 11-pentol, (1 $\alpha$ , 3 $\beta$ ,<br>5 $\alpha$ , 6 $\beta$ , 11 $\alpha$ ) <b>(243)</b> ;<br>ergost-24(28)-ene-1, 3, 6, 11-tetra-acetyl-5-ol,<br>(1 $\alpha$ , 3 $\beta$ , 5 $\alpha$ , 6 $\beta$ , 11 $\alpha$ ) <b>(244)</b> | <i>Sinularia terspilli</i>   | HL-60   | Promyelocytic leukemia          | Human | 0.004; 0.002; 0.025                       | 0.0005 $\pm$ 0.0008                | 40 g/kg                       | 3.0 mg;<br>3.0 mg;<br>2.0 mg                                  | [127] |
|                                                                                                                                                                                                                                                                                                                                                                      |                              | K-562   | Chronic myelogenous leukemia    | Human | 0.005; 0.003; 0.04                        | 0.0023 $\pm$ 0.005<br>(Taxol)      |                               |                                                               |       |
|                                                                                                                                                                                                                                                                                                                                                                      |                              |         |                                 |       |                                           |                                    |                               |                                                               |       |
| Sinubrasone B <b>(247)</b> ;<br>sinubrasone C <b>(248)</b>                                                                                                                                                                                                                                                                                                           | <i>Sinularia brassica</i>    | P-388D1 | Lymphoma                        | Mouse | 9.7 $\pm$ 1.2; 5.7 $\pm$ 1.8              | 6.2 $\pm$ 0.7                      | 9.3 g/kg<br>(dry<br>weight)   | 0.8 mg;<br>1.1 mg                                             | [129] |
|                                                                                                                                                                                                                                                                                                                                                                      |                              | MOLT-4  | Acute lymphoblastic leukemia    | Human | 6.0 $\pm$ 0.4; 5.3 $\pm$ 1.3              | 6.9 $\pm$ 1.3                      |                               |                                                               |       |
|                                                                                                                                                                                                                                                                                                                                                                      |                              | K-562   | Chronic myelogenous leukemia    | Human | 5.2 $\pm$ 0.8; 12.1 $\pm$ 2.4             | 33.1 $\pm$ 8.9                     |                               |                                                               |       |
|                                                                                                                                                                                                                                                                                                                                                                      |                              | HT-29   | Colonic carcinoma               | Human | 7.6 $\pm$ 2.3; 10.4 $\pm$ 2.2             | 7.7 $\pm$ 0.8<br>(5-Fluorouracil)  |                               |                                                               |       |
| Ximaosteroid E <b>(253)</b> ;<br>ximaosteroid F <b>(254)</b> ;<br>(20S)-20-hydroxycholest-1-ene-3,16-dione<br><b>(255)</b>                                                                                                                                                                                                                                           | <i>Sinularia</i> sp.         | HL-60   | Promyelocytic leukemia          | Human | 1.79; 4.03; 0.69                          | 0.03<br>(Doxorubicin)              | 30.8 g/kg<br>(dry<br>weight)  | 17.5 mg;<br>8.1 mg;<br>2.1 mg                                 | [134] |
| 7 $\beta$ -acetoxy-24-methyl-cholesta-5,24(28)-dien-<br>3 $\beta$ ,19-diol <b>(260)</b> ;<br>7 $\beta$ -acetoxy-cholest-5-en-3 $\beta$ ,19-diol <b>(261)</b>                                                                                                                                                                                                         | <i>Sinularia polydactyla</i> | HeLa    | Cervical epitheloid carcinoma   | Human | 7.5 $\pm$ 0.1; 12.0 $\pm$ 1.7             | 11.4 $\pm$ 3.8                     | 154.3 g/kg<br>(dry<br>weight) | 2.1 mg;<br>1.0 mg                                             | [140] |
|                                                                                                                                                                                                                                                                                                                                                                      |                              | MCF-7   | Breast adenocarcinoma           | Human | 8.9 $\pm$ 0.0; 11.2 $\pm$ 0.5             | 7.7 $\pm$ 1.7                      |                               |                                                               |       |
| (24S)-3 $\beta$ -hydroxyergost-5-en-21-oic acid<br><b>(264)</b> ;<br>(24S)-3 $\beta$ -acetoxyergost-5-en-21-oic acid                                                                                                                                                                                                                                                 | <i>Cladiella australis</i>   | Hep G2  | Hepatocellular carcinoma        | Human | 2.2; 8.6                                  | Not reported                       | 14.7 g/kg                     | 10 mg;<br>3.5 mg                                              | [143] |
|                                                                                                                                                                                                                                                                                                                                                                      |                              | Hep 3B  | Hepatocellular carcinoma        | Human | 2.8; 3.9                                  |                                    |                               |                                                               |       |
| Klyflaccisteroid A <b>(304)</b> ;<br>klyflaccisteroid C <b>(305)</b> ;<br>klyflaccisteroid D <b>(306)</b> ;<br>klyflaccisteroid E <b>(307)</b>                                                                                                                                                                                                                       | <i>Klyxum flaccidum</i>      | HT-29   | Colon adenocarcinoma            | Human | (–); 8.2; 8.0; 6.9                        | 1.1                                | 15 g/kg                       | 4.3 mg;<br>1.4 mg;<br>1.5 mg;<br>1.1 mg                       | [164] |
|                                                                                                                                                                                                                                                                                                                                                                      |                              | A-549   | Lung epithelial carcinoma       | Human | 7.7; 6.1; 17.5; (–)                       | 14.3                               |                               |                                                               |       |
|                                                                                                                                                                                                                                                                                                                                                                      |                              | P-388   | lymphocytic leukemia            | Mouse | (–); 10.8; 11.7; 3.7                      | 0.7                                |                               |                                                               |       |
|                                                                                                                                                                                                                                                                                                                                                                      |                              | K-562   | Chronic myelogenous leukemia    | Human | (–); 17.3; 12.9; (–)                      | 4.1                                |                               |                                                               |       |
|                                                                                                                                                                                                                                                                                                                                                                      |                              |         |                                 |       |                                           | (5-Fluorouracil)                   |                               |                                                               |       |

Table S3. *Cont.*

| Compound                                                         | Species                 | Cells | Cancer type               | Organism | IC <sub>50</sub> (or ED <sub>50</sub> )<br>$\mu$ g/mL or $\mu$ M | IC <sub>50</sub> (or ED <sub>50</sub> )<br>positive control | Quantity of<br>extract per<br>kg of coral | Absolute<br>quantity of<br>isolated<br>products | Ref.  |
|------------------------------------------------------------------|-------------------------|-------|---------------------------|----------|------------------------------------------------------------------|-------------------------------------------------------------|-------------------------------------------|-------------------------------------------------|-------|
| Klyflaccisteroid F <b>(309)</b>                                  | <i>Klyxum flaccidum</i> | A-549 | Lung epithelial carcinoma | Human    | 14.5                                                             | 14.3<br>(5-Fluorouracil)                                    | 15 g/kg                                   | 4.3 mg                                          | [164] |
| 3 $\beta$ ,11-dihydroxy-9,11-secogorgost-5-en-9-one <b>(308)</b> | <i>Klyxum flaccidum</i> | HT-29 | Colon adenocarcinoma      | Human    | 13.9                                                             | 1.1                                                         | 15 g/kg                                   | 200 mg                                          | [164] |
|                                                                  |                         | A-549 | Lung epithelial carcinoma | Human    | 12.5                                                             | 14.3                                                        |                                           |                                                 |       |
|                                                                  |                         | P-388 | lymphocytic leukemia      | Murin    | 7.1                                                              | 0.7<br>(5-Fluorouracil)                                     |                                           |                                                 |       |

|                                                                |                                      |            |                           |       |          |                       |              |                   |       |
|----------------------------------------------------------------|--------------------------------------|------------|---------------------------|-------|----------|-----------------------|--------------|-------------------|-------|
| 24-methylenecholest-4-ene- 3 $\beta$ ,6 $\beta$ -diol<br>(325) | <i>Alcyonium<br/>Patagonicum</i>     | P-388      | Lymphocytic leukemia      | Murin | 1        | Not reported          | Not reported | 2.3 mg            | [170] |
| Hemiketal 2 (326)                                              | <i>Alcyonium<br/>gracillimum</i>     | P-388      | Lymphocytic leukemia      | Murin | 7.8      | Not reported          | 3.1 g/kg     | 30 mg             | [175] |
| Paraminabeolide A (338);<br>Minabeolide-1 (340)                | <i>Paraminabea<br/>acronocephala</i> | Hep G2     | Hepatocellular carcinoma  | Human | 8.0; 5.2 | 0.5 (Doxorubicin)     | 7.9 g/kg     | 1.8 mg;<br>2.0 mg | [180] |
| Paraminabic acid C (342)                                       | <i>Paraminabea<br/>acronocephala</i> | Hep 3B     | Hepatocellular carcinoma  | Human | 2.83     | 0.40                  | 7.9 g/kg     | 5.1mg             | [178] |
|                                                                |                                      | MCF-7      | Breast carcinoma          | Human | 2.23     | 0.68                  |              |                   |       |
|                                                                |                                      | A-549      | Lung epithelial carcinoma | Human | 2.05     | 1.33                  |              |                   |       |
|                                                                |                                      | MDA-MB-231 | Breast adenocarcinoma     | Human | 2.25     | 1.32<br>(Doxorubicin) |              |                   |       |

**Table S4** Further studies.

| Compound                         | Cells           | Cancer type                                         | Further studies                                                                                                                                          | Results after treatment                                                                                                                                                      | Ref.  |
|----------------------------------|-----------------|-----------------------------------------------------|----------------------------------------------------------------------------------------------------------------------------------------------------------|------------------------------------------------------------------------------------------------------------------------------------------------------------------------------|-------|
| 5-Episinuleptolide acetate (207) | HL-60           | Human promyelocytic leukemia                        | Annexin V-FITC/propidium iodide (PI) double staining apoptotic assay analyzed with flow cytometry                                                        | The percentages of annexin-positive cells were increased                                                                                                                     | [115] |
|                                  |                 |                                                     | Evaluation of apoptosis-regulated proteins expression levels by western blotting assay                                                                   | Caspases -3, -8, and -9 were substantially up-regulated as well as PARP cleavage, H2A.X phosphorylation, and XIAP (a caspase inhibitor) were down-regulated                  |       |
|                                  |                 |                                                     | Analysis of the mitochondrial membrane potential (MMP) change by flow cytometric assay with JC-1 cationic dye                                            | The mitochondrial membrane potential was decreased                                                                                                                           |       |
|                                  |                 |                                                     | Analysis of reactive oxygen species (ROS) production by flow cytometric assay with a carboxy derivative of fluorescein dye, carboxy-H <sub>2</sub> DCFDA | The generation of ROS was increased                                                                                                                                          |       |
|                                  |                 |                                                     | Analysis of intracellular Ca <sup>2+</sup> release by flow cytometric assay with a fluorescent calcium indicator, Fluo 3                                 | The accumulation of intracellular Ca <sup>2+</sup> was increased                                                                                                             |       |
|                                  |                 |                                                     | Evaluation of Hsp90 and its client proteins expression levels by western blotting assay                                                                  | Hsp90 protein and several client proteins were down-regulated                                                                                                                |       |
| Sinulariaoid (215)               | HepG2/ADM       | Human hepatocellular carcinoma multidrug-resistance | Annexin V-FITC/propidium iodide (PI) double staining apoptotic assay analyzed with flow cytometry                                                        | The percentage of late apoptotic cells (Annexin V <sup>+</sup> /PI <sup>+</sup> ) was increased                                                                              | [112] |
|                                  |                 |                                                     | Evaluation of cleaved-PARP, an apoptosis marker, expression levels by western blotting assay                                                             | The cleaved form of PARP was up-regulated                                                                                                                                    |       |
|                                  |                 |                                                     | Evaluation of P-glycoprotein (P-gp) expression levels by western blotting assay                                                                          | The P-gp expression level was unchanged                                                                                                                                      |       |
| Sinularin (205)                  | A2058           | Human melanoma                                      | Wound healing assay and cell migration assay                                                                                                             | Cell migration capacity was suppressed                                                                                                                                       | [102] |
|                                  |                 |                                                     | Cell cycle distributions determined by propidium iodide (PI) staining and flow cytometry analysis                                                        | The population of cells arrested in G2/M checkpoint was increased                                                                                                            |       |
|                                  |                 |                                                     | Annexin V-FITC/propidium iodide (PI) double staining apoptotic assay analyzed with flow cytometry                                                        | The percentage of early-stage apoptotic cells (annexin V <sup>+</sup> /PI <sup>+</sup> ) was increased                                                                       |       |
|                                  |                 |                                                     | Comparative proteomic analysis validated by western blotting assay                                                                                       | The expression levels of several proteins associated with anti-proliferation, induction of apoptosis as well as oxidative-stress protection were changed                     |       |
| Sinularin (205)                  | AGS and NCI-N87 | Human gastric carcinoma                             | Transwell cell migration assay                                                                                                                           | Cell migration capacity was inhibited                                                                                                                                        | [123] |
|                                  |                 |                                                     | Analysis of the mitochondrial membrane potential (MMP) change by flow cytometric assay with JC-1 cationic dye                                            | The mitochondrial membrane potential was decreased                                                                                                                           |       |
|                                  |                 |                                                     | Evaluation of PI3K/Akt/mTOR pathway by western blotting assay                                                                                            | The expression levels of phosphorylated PI3K, Akt, mTOR, and GSK3 $\beta$ were decreased                                                                                     |       |
| Sinularin (205)                  | HepG2           | Human hepatocellular carcinoma                      | Cell cycle distributions determined by propidium iodide (PI) staining and flow cytometry analysis                                                        | The population of cells arrested in G2/M checkpoint was increased                                                                                                            | [131] |
|                                  |                 |                                                     | Annexin V-FITC/propidium iodide (PI) double staining apoptotic assay analyzed with flow cytometry                                                        | The percentages of early apoptotic (annexin V <sup>+</sup> /PI <sup>+</sup> ) and late apoptotic or necrotic cells (annexin V <sup>+</sup> /PI <sup>+</sup> ) were increased |       |

|                 |        |                                        |                                                                                                               |                                                                                                                                                                                                     |       |
|-----------------|--------|----------------------------------------|---------------------------------------------------------------------------------------------------------------|-----------------------------------------------------------------------------------------------------------------------------------------------------------------------------------------------------|-------|
|                 |        |                                        | Analysis of G2/M-related proteins expression levels by western blotting assay                                 | The expression of G2/M corresponding proteins was changed                                                                                                                                           |       |
|                 |        |                                        | Analysis of the mitochondrial membrane potential (MMP) change by flow cytometric assay with JC-1 cationic dye | The mitochondrial membrane potential was decreased                                                                                                                                                  |       |
|                 |        |                                        | Evaluation of apoptotic proteins expression levels by western blotting assay                                  | Cleaved caspases 8, 9, 3, PAPR, and Bax were up-regulated as well as Bcl-2 was down-regulated                                                                                                       |       |
|                 |        |                                        | ATM/Chk2 DNA damage pathway analysis by western blotting assay                                                | The expression levels of DNA damage signaling molecules were increased                                                                                                                              |       |
| Sinularin (205) | Ca9-22 | Human gingival squamous cell carcinoma | Analysis of ROS flow cytometry patterns                                                                       | The relative ROS-positive staining of cells were increased                                                                                                                                          | [190] |
|                 |        |                                        | Cell morphology analysis of apoptosis                                                                         | The morphological features of apoptosis, such as apoptotic bodies and cell shrinkage, were visualized                                                                                               |       |
|                 |        |                                        | Cell cycle distributions determined by propidium iodide (PI) staining and flow cytometry analysis             | The population of cells arrested in G2/M checkpoint was increased                                                                                                                                   |       |
|                 |        |                                        | G2/M arrest signaling proteins analysis by western blotting assay                                             | G2/M regulatory proteins were up-regulated                                                                                                                                                          |       |
|                 |        |                                        | Annexin V-FITC/propidium iodide (PI) double staining apoptotic assay analyzed with flow cytometry             | The percentages of annexin V-positive cells (Annexin V <sup>+</sup> /PI <sup>+</sup> and Annexin V <sup>+</sup> /PI <sup>-</sup> ) were increased                                                   |       |
|                 |        |                                        | Pancaspase analysis by flow cytometric assay                                                                  | The percentages of pancaspase-positive cells were enhanced                                                                                                                                          |       |
| Sinularin (205) | SKBR3  | Human breast carcinoma                 | Cell cycle analysis by 7-aminoactinomycin D (7AAD) flow cytometric assay                                      | The population of cells arrested in G2/M checkpoint was increased                                                                                                                                   | [191] |
|                 |        |                                        | Annexin V/7AAD-based Apoptosis pattern analysis by flow cytometric assay                                      | The percentages of annexin V-positive cells were increased                                                                                                                                          |       |
|                 |        |                                        | Caspase-based apoptosis patterns analysis by flow cytometric assay                                            | The percentages of pancaspase-positive (Pan (+)) cells were increased                                                                                                                               |       |
|                 |        |                                        | ROS generation analysis by DCFH-DA-based flow cytometric assay                                                | The relative ROS-positive staining cells were increased                                                                                                                                             |       |
|                 |        |                                        | MitoMP change analysis by DiOC <sub>2</sub> (3)-based flow cytometric assay                                   | The MitoMP-negative (%) cells was increased                                                                                                                                                         |       |
|                 |        |                                        | Analysis of the role of oxidative stress in terms of superoxide detection                                     | The relative MitoSOX-positive (%) cells were increased                                                                                                                                              |       |
|                 |        |                                        | Evaluation of 8-Oxo-2'-deoxyguanosine (8-oxodG), the main product of oxidative DNA damage, expression         | The 8-oxodG staining-positive expression (%) cells was increased                                                                                                                                    |       |
| Sinularin (205) | 786-O  | Human renal carcinoma                  | Cell cycle distributions determined by propidium iodide (PI) staining and flow cytometry analysis             | The population of cells arrested in G2/M checkpoint was increased                                                                                                                                   | [192] |
|                 |        |                                        | Evaluation of cell cycle-regulated proteins expression levels by western blotting assay                       | Cyclin B1, Cdc2 were down-regulated as well as p21 was up-regulated                                                                                                                                 |       |
|                 |        |                                        | Annexin V-FITC/propidium iodide (PI) double staining apoptotic assay analyzed with flow cytometry             | The percentages of Annexin V/PI positive cells were increased                                                                                                                                       |       |
|                 |        |                                        | Evaluation of several mitochondrial-mediated apoptosis proteins expression levels by western blotting assay   | Mitochondrial proteins Smac/DIABLO, Cytochrome c, and pro-apoptotic proteins like Bax and Bad were up-regulated as well as anti-apoptotic proteins like Bcl-2, Mcl-1 and Bcl-xl were down-regulated |       |

|                                                           |          |                                |                                                                                                                                                                                    |                                                                                                                                                                                                                                                                      |       |
|-----------------------------------------------------------|----------|--------------------------------|------------------------------------------------------------------------------------------------------------------------------------------------------------------------------------|----------------------------------------------------------------------------------------------------------------------------------------------------------------------------------------------------------------------------------------------------------------------|-------|
|                                                           |          |                                | PI3K/Akt/mTOR pathway analysis by western blotting assay                                                                                                                           | p-PI3K, p85, p-Akt and p-mTOR were significantly decreased and the levels of PI3K p85, Akt and mTOR were not affected.                                                                                                                                               |       |
|                                                           |          |                                | MAPKs pathway analysis by western blotting assay                                                                                                                                   | The phosphorylated MAPKs (p38 and JNK) were increased                                                                                                                                                                                                                |       |
|                                                           |          |                                | Evaluation of intracellular ROS levels using the fluorescent probe DCFH-DA                                                                                                         | The relative ROS-positive staining cells were increased                                                                                                                                                                                                              |       |
| Simularin (205)                                           | SK-HEP-1 | Human hepatocellular carcinoma | Annexin V-FITC/propidium iodide (PI) double staining apoptotic assay analyzed with flow cytometry                                                                                  | The percentages of Annexin V/PI positive cells were increased                                                                                                                                                                                                        | [193] |
|                                                           |          |                                | TUNEL assay used to detect late stages of apoptosis and DNA fragmentation                                                                                                          | The percentage TUNEL-positive cells was increased                                                                                                                                                                                                                    |       |
|                                                           |          |                                | Pro-caspases-3/9 and cleaved-caspases-3/9 expression profiles analysis                                                                                                             | The amount of pro-caspases-9 and pro-caspases-3 which was decreased as well as the amount of cleaved-caspase-9 and cleaved-caspase-3 form was increased                                                                                                              |       |
|                                                           |          |                                | Measurement of intracellular and mitochondrial ROS levels by flow cytometric assay with CM-H <sub>2</sub> DCFDA fluorescent probe and MitoSOX™ Red fluorescent probe, respectively | Both intracellular ROS and mitochondrial O <sup>2•</sup> levels were elevated                                                                                                                                                                                        |       |
|                                                           |          |                                | Measurement of mitochondrial membrane potential by flow cytometric assay with a fluorescent dyes (Rhodamine 123 or JC-1)                                                           | The mitochondrial membrane potential was reduced                                                                                                                                                                                                                     |       |
|                                                           |          |                                | Mitochondrial functions analysis                                                                                                                                                   | The mitochondrial respiration parameters were decreased such as basal mitochondrial respiration, ATP production, maximal respiration, and proton leakage. Also, extracellular acidification rate (ECAR), which is an indicator of cellular glycolysis, was decreased |       |
|                                                           |          |                                | Wound healing measurement (scratch-test assay)                                                                                                                                     | The wound healing potential was significantly decreased                                                                                                                                                                                                              |       |
|                                                           |          |                                | Transwell chamber migration assay                                                                                                                                                  | The migration ability was decreased                                                                                                                                                                                                                                  |       |
|                                                           |          |                                | Colony formation assay for the attached cells                                                                                                                                      | The colony formation potential was significantly decreased                                                                                                                                                                                                           |       |
|                                                           |          |                                | Soft agar colony formation assay for non-attached cells                                                                                                                            | The colony formation potential was significantly decreased                                                                                                                                                                                                           |       |
|                                                           |          |                                | Microscopically investigation using DAPI and phalloidin fluorescence dyes to track nuclei positions and F-actin filaments, respectively                                            | The distribution of F-actin filaments was significantly altered                                                                                                                                                                                                      |       |
| (1S,2S,3E,7E,11E)-3,7,11,15-cembratetraen-17,2-olide (13) | HT-29    | Human colon carcinoma          | Colony formation assay                                                                                                                                                             | The number of colonies was significantly reduced                                                                                                                                                                                                                     | [35]  |
|                                                           |          |                                | Analysis of reactive oxygen species (ROS) production by flow cytometric assay with a fluorescent probe, H <sub>2</sub> DCFDA                                                       | ROS generation was induced                                                                                                                                                                                                                                           |       |
|                                                           |          |                                | Analysis of the mitochondrial membrane potential (MMP) change by flow cytometric assay with Rho-123 dye                                                                            | The mitochondrial membrane potential was disrupted                                                                                                                                                                                                                   |       |
|                                                           |          |                                | Measurement of the release of cytochrome c from mitochondria to the cytosol                                                                                                        | The release of cytochrome c was increased                                                                                                                                                                                                                            |       |
|                                                           |          |                                | Cell cycle analysis                                                                                                                                                                | The sub-G1 phase population was significantly increased, while the percentages of G0/G1, S and G2/M phase were decreased                                                                                                                                             |       |
|                                                           |          |                                | Evaluation of apoptotic proteins expression levels by western blotting assay                                                                                                       | The expression of Bcl-2 and Bid was reduced as well as pro-apoptotic protein Bax, the activation of caspase-3, -8 and -9, and cleavage of PARP was increased                                                                                                         |       |

|                                                           |             |                                              |                                                                                                           |                                                                                                                                                                                                                                                                                                                       |       |
|-----------------------------------------------------------|-------------|----------------------------------------------|-----------------------------------------------------------------------------------------------------------|-----------------------------------------------------------------------------------------------------------------------------------------------------------------------------------------------------------------------------------------------------------------------------------------------------------------------|-------|
|                                                           |             |                                              | Evaluation of the activation of signal transduction by western blotting assay                             | The phosphorylation of c-Jun N-terminal kinase (JNK) and dephosphorylation of p38, extracellular signal-regulated kinase (ERK), Akt, Src and signal transducer and activator of transcription (STAT)3 were induced                                                                                                    |       |
|                                                           |             |                                              | Evaluation of antioxidant enzymes expression levels by western blotting assay                             | The expressions of antioxidant catalase and glutathione peroxidase were abrogated                                                                                                                                                                                                                                     |       |
| (1S,2S,3E,7E,11E)-3,7,11,15-cembratetraen-17,2-olide (13) | SNU-C5/5-FU | Fluorouracil-resistant human colon carcinoma | Cell morphology analysis of apoptosis                                                                     | The apoptotic bodies were increased                                                                                                                                                                                                                                                                                   | [194] |
|                                                           |             |                                              | Cell cycle distributions determined by propidium iodide (PI) staining and flow cytometry analysis         | The sub-G1 phase population was significantly increased, while the percentages of S and G2/M phase were decreased                                                                                                                                                                                                     |       |
|                                                           |             |                                              | Evaluation of apoptotic proteins expression levels by western blotting assay                              | Bcl-2 level was decreased as well procaspase-9 cleavage, procaspase-3 cleavage and poly(ADP-ribose) polymerase (PARP) cleavage were increased                                                                                                                                                                         |       |
|                                                           |             |                                              | measurement of the release of cytochrome c from mitochondria to the cytosol                               | The release of cytochrome c was increased                                                                                                                                                                                                                                                                             |       |
|                                                           |             |                                              | Analysis of the TGF- $\beta$ signaling pathway by western blotting assay and Co-Immunoprecipitation assay | Smad-3 phosphorylation was increased c-Myc was downregulate. Also, the expression of carcinoembryonic antigen (CEA), a direct inhibitor of TGF- $\beta$ signaling was decreased. LS-1 decreased the CEA level, as well as the direct interaction between CEA and TGF- $\beta$ R1 in the apoptosis-induction condition |       |
| (1S,2S,3E,7E,11E)-3,7,11,15-cembratetraen-17,2-olide (13) | SNU-C5      | Human colorectal carcinoma                   | Cell morphology analysis by Hoechst 33342 staining                                                        | The sub-G <sub>1</sub> hypodiploid cells and apoptotic bodies were increased                                                                                                                                                                                                                                          | [36]  |
|                                                           |             |                                              | Cell cycle distributions determined by propidium iodide (PI) staining and flow cytometry analysis         | The sub-G1 phase population significantly increased                                                                                                                                                                                                                                                                   |       |
|                                                           |             |                                              | Evaluation of apoptotic proteins expression levels by western blotting assay                              | The level of Bax, a pro-apoptotic protein was increased, while the level of Bcl-2, an anti-apoptotic protein, was decreased. In addition, the cleavage of caspase-3 and PARP were increased                                                                                                                           |       |
|                                                           |             |                                              | Analysis of the Wnt/ $\beta$ -catenin signaling pathway by western blotting assay                         | The levels of phospho-GSK-3 $\beta$ , the inactivated form of GSK-3 $\beta$ , and $\beta$ -catenin were decreased                                                                                                                                                                                                     |       |
|                                                           |             |                                              | Analysis of the TGF- $\beta$ signaling pathway by western blotting assay                                  | Phospho-Smad-3 level was increased as well as the expression of c-Myc, the target protein of TGF- $\beta$ signaling, was decreased                                                                                                                                                                                    |       |
| Lobophytosterol (15)                                      | HCT-116     | Human acute promyelocytic leukemia           | Apoptosis assay by staining with DNA-specific fluorescent dye                                             | Chromatin condensation in apoptotic bodies was observed                                                                                                                                                                                                                                                               | [28]  |
